# Supplementary material
Source: publisher site journal article supplement (https://www.spandidos-publications.com/4551/downloadSupplementary)
Supplement: Supplementary file 1 [file downloadSupplementary]

## Sheet: Sheet1
Table SX. Summary for the non-BM group.
A, Summary for tissue-non-BM Group (n=39)					B, Gene summary for tissue-non-BM group (n=39)												C, Summary for ctDNA-non-BM group (n=25)					D, Gene summary for ctDNA-non-BM group (n=25)
ID	summary	Mean	Median		Hugo_Symbol	Frame_Shift_Del	Frame_Shift_Ins	In_Frame_Del	In_Frame_Ins	Missense_Mutation	Nonsense_Mutation	Splice_Site	total	MutatedSamples	AlteredSamples		ID	summary	Mean	Median		Hugo_Symbol	In_Frame_Del	In_Frame_Ins	Missense_Mutation	Nonsense_Mutation	Splice_Site	total	MutatedSamples	AlteredSamples
NCBI_Build	NA	NA	NA		TP53	1	1	1	0	13	4	5	25	24	24		NCBI_Build	NA	NA	NA		TP53	2	0	7	1	1	11	9	9
Center	NA	NA	NA		EGFR	0	0	7	2	8	0	0	17	16	16		Center	NA	NA	NA		EGFR	1	0	4	0	0	5	5	5
Samples	36	NA	NA		CD3EAP	0	0	5	0	0	0	0	5	5	5		Samples	19	NA	NA		KRAS	0	0	3	0	0	3	3	3
nGenes	22	NA	NA		KRAS	0	0	0	0	5	0	0	5	5	5		nGenes	21	NA	NA		RB1	0	0	1	2	0	3	3	3
Frame_Shift_Del	1	0.028	0		PIK3CA	0	0	1	0	3	0	0	4	4	4		In_Frame_Del	5	0.263	0		CD3EAP	2	0	0	0	0	2	2	2
Frame_Shift_Ins	1	0.028	0		RB1	0	0	2	0	1	1	0	4	4	4		In_Frame_Ins	1	0.053	0		DPYD	0	0	2	0	0	2	2	2
In_Frame_Del	17	0.472	0		APC	0	0	0	0	0	3	0	3	3	3		Missense_Mutation	32	1.684	1		FGFR3	0	0	2	0	0	2	2	2
In_Frame_Ins	2	0.056	0		CTNNB1	0	0	0	0	2	0	0	2	2	2		Nonsense_Mutation	4	0.211	0		NTRK1	0	0	2	0	0	2	2	2
Missense_Mutation	46	1.278	1		CYP2D6	0	0	0	0	0	0	2	2	2	2		Splice_Site	2	0.105	0		PIK3CA	0	0	2	0	0	2	2	2
Nonsense_Mutation	8	0.222	0		ERBB4	0	0	0	0	2	0	0	2	2	2		total	44	2.316	2		APC	0	0	1	0	0	1	1	1
Splice_Site	8	0.222	0		HRAS	0	0	0	0	2	0	0	2	2	2							ATM	0	0	0	1	0	1	1	1
total	83	2.306	2		PDGFRA	0	0	0	0	2	0	0	2	2	2							BRAF	0	0	1	0	0	1	1	1
					ATM	0	0	0	0	1	0	0	1	1	1							CDKN2A	0	0	1	0	0	1	1	1
					CDKN2A	0	0	0	0	1	0	0	1	1	1							CYP2D6	0	0	0	0	1	1	1	1
					DPYD	0	0	0	0	1	0	0	1	1	1							ERBB2	0	1	0	0	0	1	1	1
					FBXW7	0	0	0	0	1	0	0	1	1	1							HRAS	0	0	1	0	0	1	1	1
					JAK2	0	0	0	0	1	0	0	1	1	1							IDH1	0	0	1	0	0	1	1	1
					KIT	0	0	0	0	0	0	1	1	1	1							OBSCN	0	0	1	0	0	1	1	1
					MTOR	0	0	0	0	1	0	0	1	1	1							SRC	0	0	1	0	0	1	1	1
					NRAS	0	0	0	0	1	0	0	1	1	1							TERT	0	0	1	0	0	1	1	1
					OBSCN	0	0	1	0	0	0	0	1	1	1							XRCC1	0	0	1	0	0	1	1	1
					TPMT	0	0	0	0	1	0	0	1	1	1
